# Supplementary material for: Authorship inequality: a bibliometric study of the concentration of authorship among a diminishing number of individuals in high-impact medical journals, 2008–2019
Source: HighWire-hosted journal article supplement (doi:10.1136/bmjopen-2020-046002), 2021-01-01
Supplement: bmjopen-2020-046002supp001_data_supplement.pdf [file bmjopen-2020-046002supp001_data_supplement.pdf]

**Supplemental Methods:****Cleaning Author Names:**

The task of linking together all publications by a given author presents two potential risks: 1) the potential to link two different authors with the same name together and 2) the potential to fail to link two different presentations of an author's name together due to differences in initials, capitalization, punctuation, etc. These problems are known as name homography and name variability, respectively. There is ongoing work using name disambiguation using machine learning to train models to disambiguate authors, and these tools rely on the inclusion of other variables such as email, organization, and co-authors. While beneficial, these models remain exploratory, and emails and organizations are not reliably available in PubMed nor are they consistent within an author across time. Therefore, we chose to rely specifically on processing and cleaning author names as they were presented in the author list without further attempts at disambiguation.

To address issues of name variability across journal styles, all names (first and last) were cleaned in the following manner. Names were processed to clean Unicode text and replace special characters such as periods, dashes, and quotation marks with spaces. After this processing, authors with blanks for first or last name were removed. Then, all text was converted to lowercase strings in order to control for any differences in capitalization (e.g. McNally vs McNally). Finally, after trimming leading and lagging white space from first names and last names, each author's name was defined as the concatenated string of their first and last name separated by a space.

**Gini Coefficient Calculation:**

Author information was extracted from PubMed for each author listed on an article in the format outlined below. Each line of the database represents an author position, and includes metadata for the article (article number, journal, year published) as well as the author specific information (first name (forename), last name, and order within the author block). To match

authors across articles, a concatenated string of the author's first and last name was created (indicated by the column "composite"). The concatenated string was cleaned using the procedures outlined above.

| article_number | ForeName   | LastName          | order | composite                 | journal      | year |
|----------------|------------|-------------------|-------|---------------------------|--------------|------|
| 18163451       | Julie M    | Barkmeier-Kraemer | 2     | Julie M Barkmeier-Kraemer | Mov. Disord. | 2008 |
| 18163451       | Michelle R | Ciucci            | 1     | Michelle R Ciucci         | Mov. Disord. | 2008 |
| 18163451       | Scott J    | Sherman           | 3     | Scott J Sherman           | Mov. Disord. | 2008 |
| 18163453       | Aileen K   | Ho                | 1     | Aileen K Ho               | Mov. Disord. | 2008 |
| 18163453       | John L     | Bradshaw          | 2     | John L Bradshaw           | Mov. Disord. | 2008 |
| 18163453       | Robert     | Iansek            | 3     | Robert Iansek             | Mov. Disord. | 2008 |

Therefore, the number of rows of the data frame indicates the total number of author positions available. Then the composite name can be used as a factor level variable to calculate a frequency table, which contains the number of author positions occupied by each author.

The Gini() function within the DescTools package in R (0.99.30) uses this frequency table to plot a Lorenz Curve and determine the Gini Coefficient (GC). The Lorenz Curve first sorts the population in increasing order based on their share of resources, in this case, number of author positions held. The x-axis presents the cumulative proportion of the population (authors) while the y axis shows the cumulative proportion of resources (author positions) held by that section of the population (moving from left to right).

This Lorenz Curve summarizes the distribution of authorship across the entire author block. If all authors held the same number of author positions, the curve would follow the diagonal line in the center of the image. However, because authors hold different numbers of author positions within our database, the Lorenz Curve deviates from the diagonal line, indicating inequality in resources held. In the example above, we can see that the bottom 60% of authors only hold about 25% of author positions. Alternatively, the

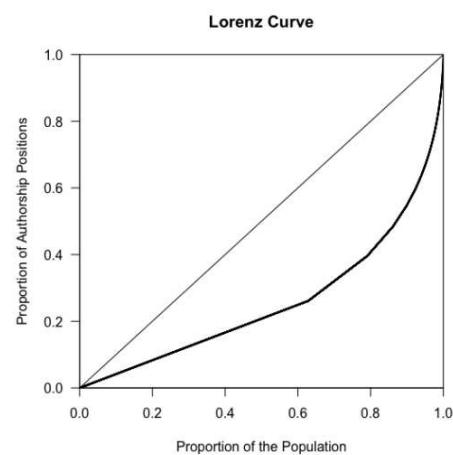

bottom 80% of authors only hold approximately 40% of the author positions. This indicates inequality in the number of author positions held across different authors.

The GC summarizes the Lorenz Curve by calculating the area between the diagonal line of equality and the curve. This space is the inequity gap. The further the curve is from the diagonal line, the greater the inequality, and therefore the greater the GC.

The GC ranges from 0 to 1, with 0 representing complete equality of resources (in this case the Lorenz Curve would follow the diagonal line) and 1 representing complete inequality in resources (or one individual holding all the resources). The figure above shows the Lorenz Curve for the overall authorship in black (GC = 0.49) and the Lorenz Curve for first authorship in red (GC = 0.30). As you can see, the curve for first authorship is closer to the diagonal line than the curve for overall authorship, which is also reflected in the lower GC for first authorship. This indicates that there is more equity in authorship distributions in the first author position than the last author position. It is important to note that the GC represents an exact quantification of the Lorenz Curve, and does not include confidence intervals.

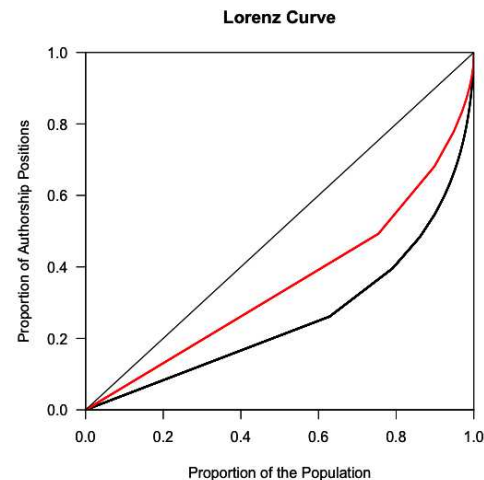

### Sensitivity Analysis on the Inclusion of Initials in the ORCID Data Frame:

Since the initials of one author may not be used consistently across publications, we also cleaned the ORCID database to remove initials, and recalculated the number of ORCID records with matching names. Initials were defined as follows:

After replacing special characters such as periods, dashes, and quotation marks with spaces, strings were separated at spaces to make an array of individual name parts (e.g. "Jane L" becomes ("Jane", "L")). Individual name parts of only one letter long (e.g. "L") were removed from the name string. Recognizing that authors around the world may use individual characters

for their first name, this rule was only applied to name parts including Latin alphabet characters (including characters with accents). The pre-processing above to replace periods and dashes with spaces will identify initials in the formats of “J.L.” or “J-L” but not “JL”. To capture these initials, first names that were entirely capitalized and only contained three or fewer Latin alphabet characters, were categorized as initials and removed. This cleaning was applied in addition to the cleaning methods outlined for the main analysis above.

Since the removal of initials in the ORCID cohort only led to a very small increase the number of authors with name homography, we chose not to clean initials in the main analysis.

**Supplemental Material:****Figure S1:**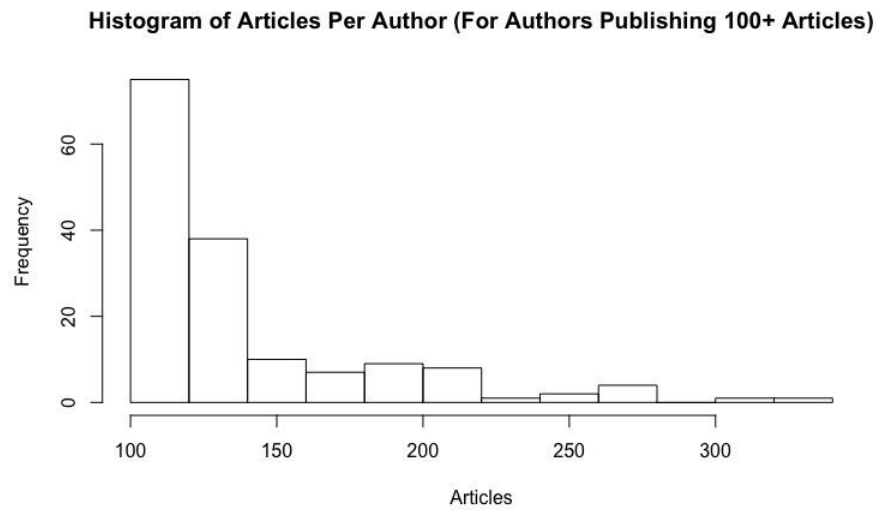

**Figure S2:** Percent Change in Author Positions and Number of Articles Published from 2008 to 2019

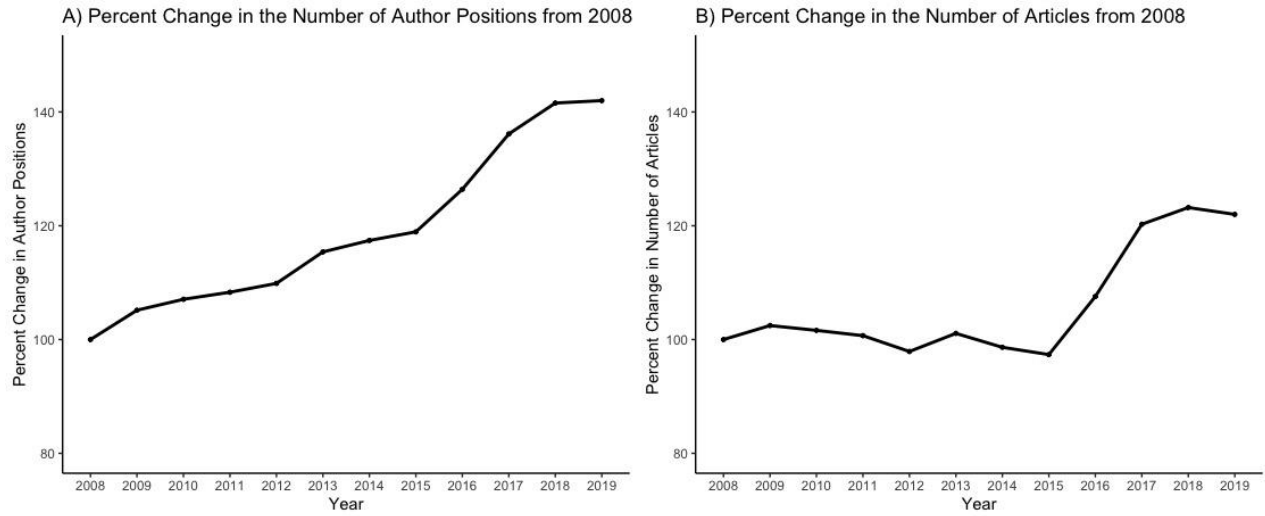

**Figure S3:** Change in Gini coefficient by authorship position over time limited to articles with 20 or fewer authors

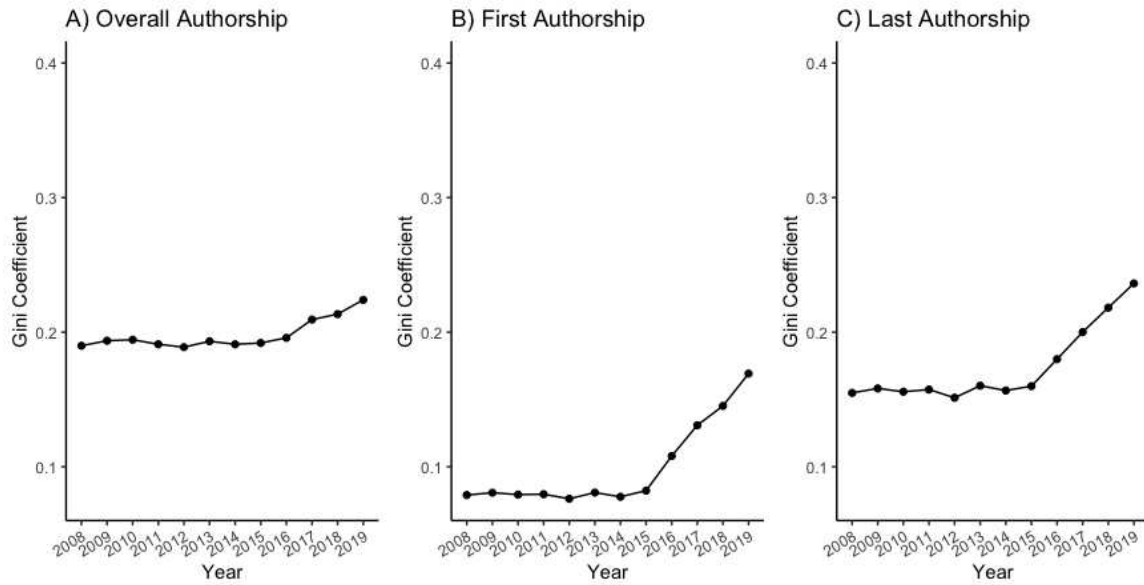

**Figure S4:** Change in Gini coefficient by authorship position over time limited to articles without a consortium as last author

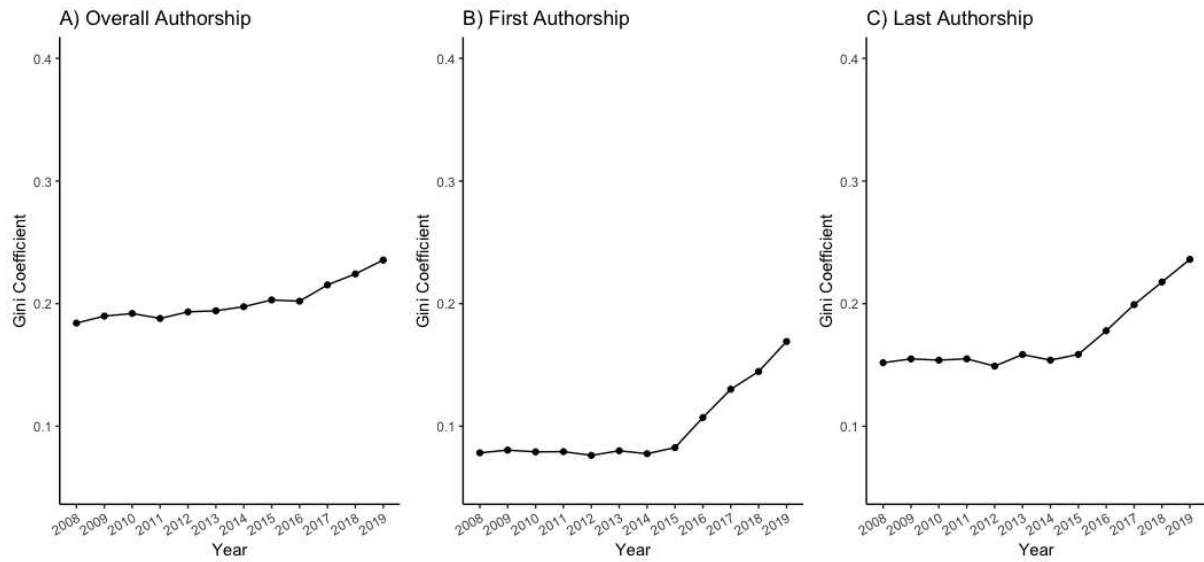



**Figure S5:** Change in Gini coefficient by authorship position over time in 10 random samplings of 20,000 articles per year

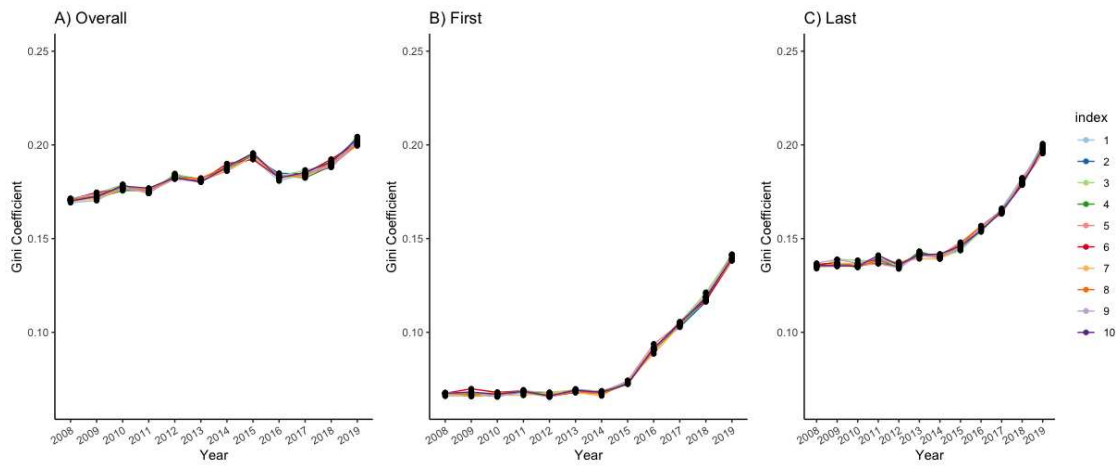

**Figure S6:** Change in Gini coefficient by authorship position over time in the entire collection excluding articles published in the cross-specialty journals

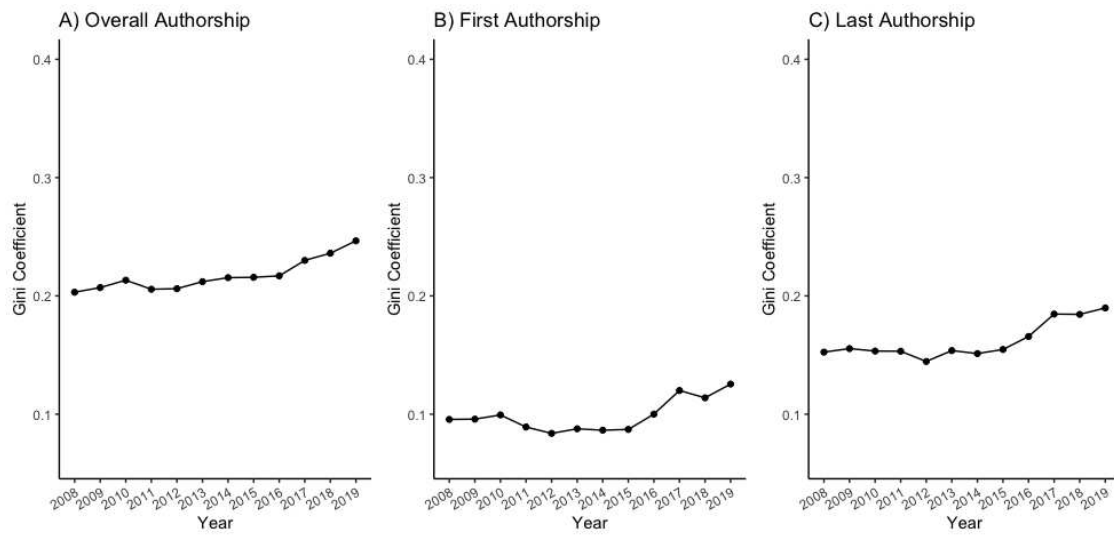

**Figure S7:** Gini coefficient by authorship position separated by specialty limiting to 1000 articles per year per specialty

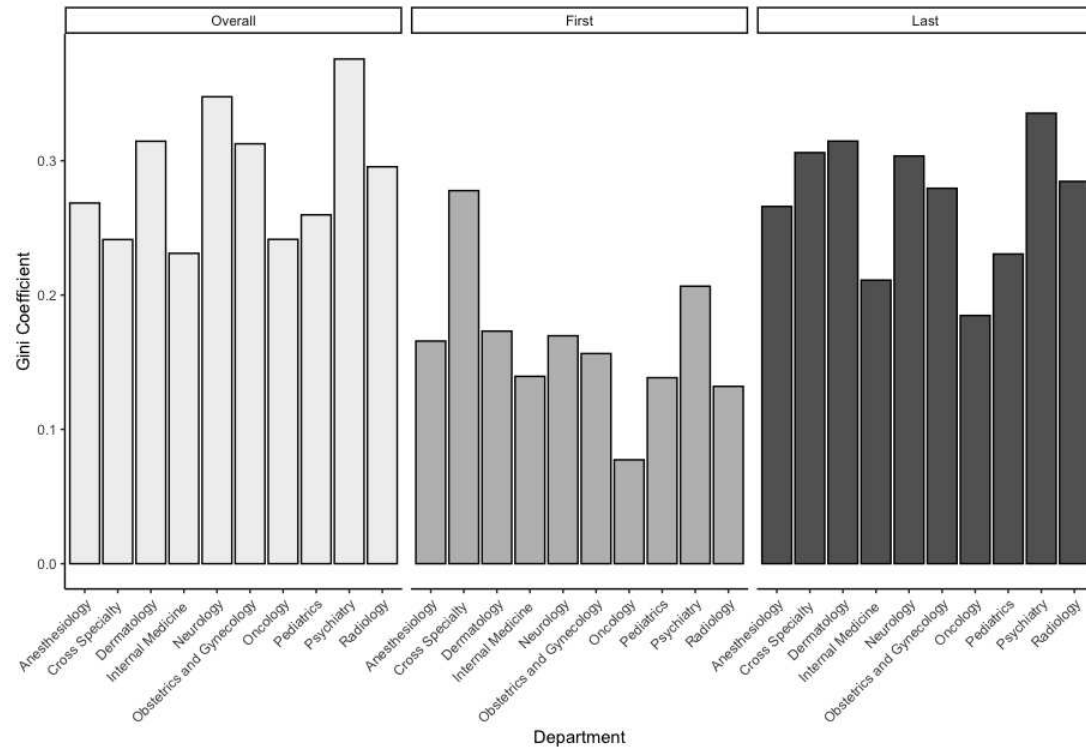

**Figure S8:** Change in Gini coefficient by authorship position over time limiting to 1000 articles per year per specialty

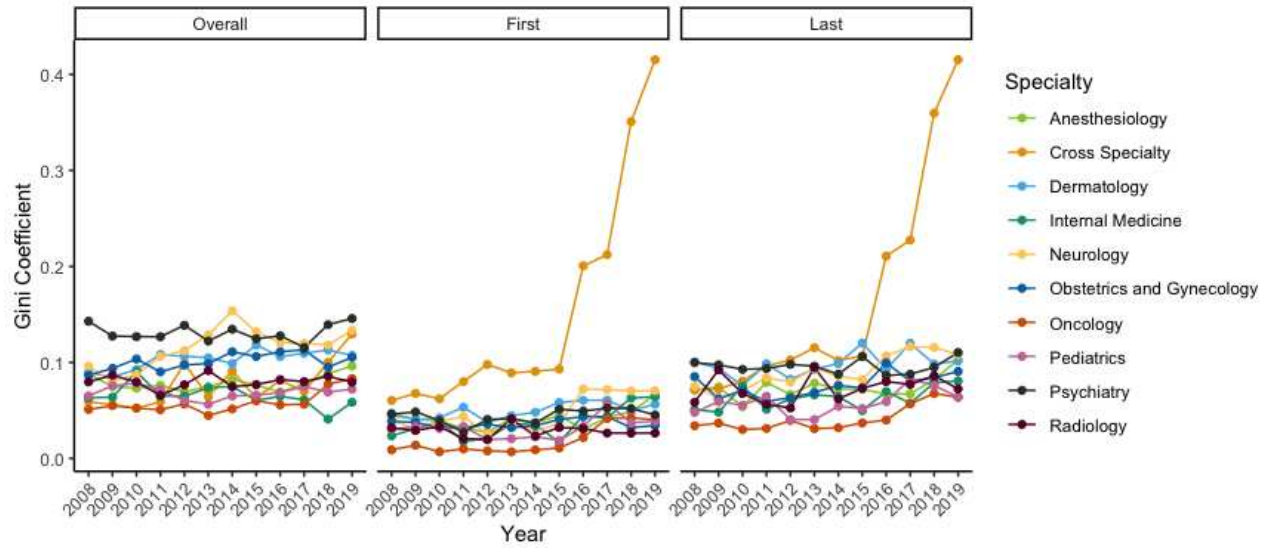

**Table S1: Journals and Impact Factors by Specialty**

| Department                   | Category                   | Impact Factor             | Department           | Category                        | Impact Factor |
|------------------------------|----------------------------|---------------------------|----------------------|---------------------------------|---------------|
| Anesthesiology               | Br J Anaesth               | 6.24                      | Internal<br>Medicine | Ann. Intern. Med.               | 17.2          |
|                              | Anesthesiology             | 5.79                      |                      | JAMA Intern Med                 | 16.54         |
|                              | Pain                       | 5.45                      |                      | PLoS Med.                       | 11.86         |
|                              | Anaesthesia                | 4.74                      |                      | J Cachexia<br>Sarcopenia Muscle | 9.7           |
|                              | J Neurosurg                | 4.03                      |                      | BMC Med                         | 8.1           |
|                              | Anesthesiol                | 4.01                      |                      | J. Intern. Med.                 | 7.98          |
|                              | Anesth. Analg.             | 3.57                      |                      | Mayo Clin. Proc.                | 6.86          |
|                              | Eur J Anaesthesiol         | 3.52                      |                      | CMAJ                            | 6.78          |
|                              | Reg Anesth Pain Med        | 3.49                      |                      | Nat Rev Dis Primers             | 6.39          |
|                              | Clin J Pain                | 3.02                      |                      | Cochrane Database<br>Syst Rev   | 6.26          |
|                              | Eur J Pain                 | 2.84                      |                      | Am. J. Med.                     | 5.55          |
|                              | Pain Physician             | 2.62                      |                      | Ann Fam Med                     | 4.92          |
|                              | Minerva Anesthesiol        | 2.5                       |                      | Transl Res                      | 4.65          |
|                              | Pain Pract                 | 2.44                      |                      | Dtsch Arztebl Int               | 4.26          |
|                              | Acta Anaesthesiol<br>Scand | 2.37                      |                      | Palliat Med                     | 4.22          |
|                              | Dermatology                | J. Am. Acad.<br>Dermatol. |                      | 7                               | Neurology     |
| J. Invest. Dermatol.         |                            | 6.29                      | Nat Rev Neurol       | 20.26                           |               |
| JAMA Dermatol                |                            | 5.82                      | Acta Neuropathol.    | 12.21                           |               |
| Pigment Cell<br>Melanoma Res |                            | 5.17                      | Brain                | 10.29                           |               |
| Br. J. Dermatol.             |                            | 4.71                      | JAMA Neurol          | 10.03                           |               |

|                              |                      |       |          |                       |        |
|------------------------------|----------------------|-------|----------|-----------------------|--------|
|                              | Contact Derm.        | 4.34  |          | Ann. Neurol.          | 9.89   |
|                              | J. Dermatol. Sci.    | 3.73  |          | Alzheimers Dement     | 9.48   |
|                              | Acta Dermatovenerol  | 3.65  |          | Sleep Med Rev         | 8.96   |
|                              | Alp Pannonica Adriat |       |          | Neurology             | 8.32   |
|                              | J Eur Acad Dermatol  | 3.53  |          | Neuro-oncology        | 7.79   |
|                              | Venereol             |       |          | Neuroscientist        | 7.39   |
|                              | Wound Repair Regen   | 3.04  |          | J. Neurol. Neurosurg. | 7.349  |
|                              | J Dtsch Dermatol Ges | 2.87  |          | Psychiatry            |        |
|                              | Int Wound J          | 2.85  |          | Mov. Disord.          | 7.07   |
|                              | Skin Pharmacol       | 2.76  |          | Brain Pathol.         | 6.62   |
|                              | Physiol              |       |          | Alzheimers Res Ther   | 6.15   |
|                              | Am J Clin Dermatol   | 2.76  |          |                       |        |
|                              | Photodermatol        |       |          |                       |        |
|                              | Photoimmunol         | 2.66  |          |                       |        |
|                              | Photomed             |       |          |                       |        |
| Obstetrics and<br>Gynecology | Hum. Reprod.         | 11.75 | Oncology | CA Cancer J Clin      | 187.04 |
|                              | Update               |       |          | Nat. Rev. Cancer      | 37.15  |
|                              | Am. J. Obstet.       | 5.23  |          | Lancet Oncol.         | 33.9   |
|                              | Gynecol.             |       |          | Cancer Cell           | 27.41  |
|                              | Obstet Gynecol       | 5.22  |          | J. Clin. Oncol.       | 24.01  |
|                              | BJOG                 | 5.05  |          | Nat Rev Clin Oncol    | 20.69  |
|                              | Hum. Reprod.         | 5.02  |          | Cancer Discov         | 20.01  |
|                              | Gynecol. Oncol.      | 4.96  |          | JAMA Oncol            | 16.56  |
|                              | Ultrasound Obstet    | 4.71  |          | J. Natl. Cancer Inst. | 12.59  |
|                              | Gynecol              |       |          | Ann. Oncol.           | 11.86  |
|                              | Fertil. Steril.      | 4.45  |          | Leukemia              | 11.7   |
|                              | Pregnancy Hypertens  | 3.93  |          |                       |        |
|                              | Mol. Hum. Reprod.    | 3.59  |          |                       |        |
|                              | Maturitas            | 3.26  |          |                       |        |

|                                             |                                       |       |                     |                                       |       |
|---------------------------------------------|---------------------------------------|-------|---------------------|---------------------------------------|-------|
|                                             | Reprod. Biomed.<br>Online             | 3.25  |                     | Clin. Cancer Res.                     | 9.62  |
|                                             | Clin Perinatol                        | 3.233 |                     | Biochim. Biophys.<br>Acta             | 9.45  |
|                                             | Semin. Perinatol.                     | 3.185 |                     | Semin. Cancer Biol.                   | 9.14  |
|                                             | J Gynecol Oncol                       | 3.14  |                     | Cancer Res.                           | 9.12  |
| Pediatrics                                  | JAMA Pediatr                          | 10.25 | Psychiatry          | World Psychiatry                      | 26.56 |
|                                             | J Am Acad Child<br>Adolesc Psychiatry | 6.44  |                     | JAMA Psychiatry                       | 15.31 |
|                                             | Pediatrics                            | 5.71  |                     | Am J Psychiatry                       | 14.18 |
|                                             | Pediatr Diabetes                      | 4.27  |                     | Mol. Psychiatry                       | 13.2  |
|                                             | Arch. Dis. Child.                     | 4.1   |                     | Lancet Psychiatry                     | 11.59 |
|                                             | Fetal Neonatal Ed.                    |       |                     | Biol. Psychiatry                      | 11.41 |
|                                             | J Adolesc Health                      | 3.97  |                     | Psychother                            | 8.96  |
|                                             | J. Pediatr.                           | 3.87  |                     | Psychosom                             |       |
|                                             | Pediatr Allergy<br>Immunol            | 3.78  |                     | Schizophr Bull                        | 7.58  |
|                                             | Pediatr Crit Care<br>Med              | 3.5   |                     | J. Neurol. Neurosurg.<br>Psychiatry   | 7.35  |
|                                             | Pediatr Obes                          | 3.4   |                     | Acta Psychiatr Scand                  | 6.79  |
|                                             | Semin Fetal Neonatal<br>Med           | 3.33  |                     | Neuropsychopharmac<br>ology           | 6.4   |
|                                             | Eur Child Adolesc<br>Psychiatry       | 3.3   |                     | J Am Acad Child<br>Adolesc Psychiatry | 6.44  |
|                                             | Arch. Dis. Child.                     | 3.27  |                     | Br J Psychiatry                       | 6.35  |
|                                             | Clin Perinatol                        | 3.23  |                     | J Child Psychol<br>Psychiatry         | 6.23  |
|                                             | Semin. Perinatol.                     | 3.19  |                     | Addiction                             | 5.79  |
| Radiology, Nuclear<br>Medicine, and Imaging | JACC Cardiovasc<br>Imaging            | 10.19 | Cross-<br>Specialty | N. Engl. J. Med.                      | 72.41 |

|                        |      |        |       |
|------------------------|------|--------|-------|
| Radiology              | 7.3  | Lancet | 47.83 |
| Eur. J. Nucl. Med.     | 7.28 | JAMA   | 44.41 |
| Mol. Imaging           |      |        |       |
| Circ Cardiovasc        | 6.8  | BMJ    | 20.79 |
| Imaging                |      |        |       |
| J. Nucl. Med.          | 6.65 |        |       |
| Neuroimage             | 5.84 |        |       |
| J Cardiovasc Magn      | 5.6  |        |       |
| Reson                  |      |        |       |
| Semin Radiat Oncol     | 5.36 |        |       |
| Invest Radiol          | 5.2  |        |       |
| Int. J. Radiat. Oncol. | 5.13 |        |       |
| Biol. Phys.            |      |        |       |
| Ultrasound Obstet      | 4.71 |        |       |
| Gynecol                |      |        |       |
| Clin Nucl Med          | 4.56 |        |       |
| Hum Brain Mapp         | 4.53 |        |       |
| Radiother Oncol        | 4.33 |        |       |
| Med Image Anal         | 4.19 |        |       |

Adapted from Hart KL, Perlis RH. Trends in Proportion of Women as Authors of Medical Journal Articles, 2008-2018. *JAMA Intern Med.* 2019 Sep 1;179(9):1285.



**Table S2:** Gini Coefficient by authorship position separated by specialty

| <b>Specialty</b>          | <b>Overall Authorship</b> | <b>First Authorship</b> | <b>Last Authorship</b> |
|---------------------------|---------------------------|-------------------------|------------------------|
| Internal Medicine         | 0.30                      | 0.20                    | 0.28                   |
| Pediatrics                | 0.37                      | 0.23                    | 0.34                   |
| Anesthesiology            | 0.36                      | 0.25                    | 0.36                   |
| Oncology                  | 0.42                      | 0.20                    | 0.37                   |
| Psychiatry                | 0.43                      | 0.25                    | 0.39                   |
| Obstetrics and Gynecology | 0.44                      | 0.27                    | 0.40                   |
| Cross Specialty           | 0.34                      | 0.38                    | 0.41                   |
| Dermatology               | 0.41                      | 0.25                    | 0.41                   |
| Neurology                 | 0.46                      | 0.26                    | 0.42                   |
| Radiology                 | 0.47                      | 0.28                    | 0.46                   |

**Table S3:** Gini Coefficients for each sensitivity analysis by author position

|                              | <b>Entire<br/>Collection*</b> | <b>Articles with 20 or<br/>fewer authors</b> | <b>Articles without<br/>a consortium as<br/>last author</b> | <b>Excluding articles<br/>published in the 4<br/>cross-specialty<br/>journals</b> |
|------------------------------|-------------------------------|----------------------------------------------|-------------------------------------------------------------|-----------------------------------------------------------------------------------|
| GC for entire author block   | 0.49                          | 0.47                                         | 0.47                                                        | 0.48                                                                              |
| GC for first author position | 0.30                          | 0.29                                         | 0.29                                                        | 0.28                                                                              |
| GC for last author position  | 0.44                          | 0.44                                         | 0.43                                                        | 0.44                                                                              |

\*The GCs for the primary analysis of the entire cohort are included for reference

**Table S4:** Spearman rank order correlations between year and Gini coefficient for each random sampling of 20,000 articles

|                   | <b>Overall</b> |          | <b>First Authorship</b> |          | <b>Last Authorship</b> |          |
|-------------------|----------------|----------|-------------------------|----------|------------------------|----------|
|                   | <b>rho</b>     | <b>P</b> | <b>rho</b>              | <b>P</b> | <b>rho</b>             | <b>P</b> |
| Primary Analysis* | 0.99           | <0.001   | 0.75                    | 0.007    | 0.85                   | <0.001   |
| Model 1           | 0.88           | < 0.001  | 0.92                    | < 0.001  | 0.90                   | < 0.001  |
| Model 2           | 0.90           | < 0.001  | 0.92                    | < 0.001  | 0.92                   | < 0.001  |
| Model 3           | 0.88           | < 0.001  | 0.98                    | < 0.001  | 0.92                   | < 0.001  |
| Model 4           | 0.87           | < 0.001  | 0.86                    | 0.001    | 0.90                   | < 0.001  |
| Model 5           | 0.88           | < 0.001  | 0.89                    | < 0.001  | 0.92                   | < 0.001  |
| Model 6           | 0.94           | < 0.001  | 0.81                    | 0.002    | 0.94                   | < 0.001  |
| Model 7           | 0.91           | < 0.001  | 0.84                    | 0.001    | 0.98                   | < 0.001  |
| Model 8           | 0.91           | < 0.001  | 0.83                    | 0.002    | 0.98                   | < 0.001  |
| Model 9           | 0.91           | < 0.001  | 0.80                    | 0.003    | 0.92                   | < 0.001  |
| Model 10          | 0.88           | < 0.001  | 0.85                    | 0.001    | 0.97                   | < 0.001  |

\*The correlation coefficients for the primary analysis of the entire cohort are included for reference. Models 1-10 refer to models derived from randomly samplings of 20,000 articles for each year within the study period and repeating the correlation between year and GC for each author position.

**Table S5:** Gini coefficients for each gender separated by author position

|                              | <b>Authors identified<br/>as men</b> | <b>Authors identified<br/>as women</b> |
|------------------------------|--------------------------------------|----------------------------------------|
| GC for entire author block   | 0.53                                 | 0.45                                   |
| GC for first author position | 0.33                                 | 0.28                                   |
| GC for last author position  | 0.47                                 | 0.43                                   |

**Table S6:** Spearman rank order correlations by author position by gender

| <b>Author Position</b> | <b>Authors identified as men</b> |          | <b>Authors identified as women</b> |          |
|------------------------|----------------------------------|----------|------------------------------------|----------|
|                        | <b>rho</b>                       | <b>P</b> | <b>rho</b>                         | <b>P</b> |
| Entire author block    | 0.97                             | <0.001   | 0.99                               | <0.001   |
| First author position  | 0.85                             | <0.001   | 0.85                               | <0.001   |
| Last author position   | 0.83                             | 0.002    | 0.96                               | <0.001   |

**Supplemental Results:**

- *Controlling for Author Block Length, Consortia, and Number of Articles Published per Year*

Table S2 presents the GC for each authorship position (overall, first author, and last author) for each sensitivity analysis.

Our data indicated that there was a significant increase in the number of author positions from 2008 to 2019 (160795 author positions in 2008 and 228324 author positions in 2019, Figure S2A;  $r(10) = 0.97$ ,  $p < 0.001$ ). Therefore, we conducted a sensitivity analysis to control for the extreme right tail of author block lengths by repeating the primary analyses solely among articles with 20 or fewer authors. This threshold was chosen to exclude articles with the largest author blocks, while also keeping at least 95% of articles for analysis (n excluded = 10188 articles). The results of this analysis were qualitatively similar to the primary results (Figure S3). Looking within articles with 20 or fewer authors (n articles = 302,034), there was a significant positive correlation between year and GC for the overall authorship position ( $\rho = 0.68$ ,  $p = 0.02$ ), for the first author position ( $\rho = 0.78$ ,  $p = 0.005$ ), and for the last author position ( $\rho = 0.83$ ,  $p = 0.001$ ).

Alternatively, inclusion of consortiums as authors may also influence the number of authorship positions, as some authors may be included within the consortium but not in the main author block. Results were generally unchanged from those in the primary analysis. In groups without a consortium listed as the last author (n articles = 299,235), there was a significant positive correlation between year and GC for the overall authorship position ( $\rho = 0.97$ ,  $p < 0.001$ ), the first author position ( $\rho = 0.75$ ,  $p = 0.007$ ), and the last author position ( $\rho = 0.86$ ,  $p < 0.001$ ; Figure S4).

Additionally, there was a significant increase in the number of publications per year from 2008 to 2019 (24800 articles in 2008 and 30256 articles in 2019;  $r(10) = 0.75$ ,  $p = 0.005$ ), with the most substantial increase in the number of articles occurring between 2015 and 2017 (Figure S2B). Therefore, to account potential influences of the increase in the number of articles published during the study period, we repeated the primary analysis 10 times, each time randomly sampling 20,000 articles from each year without replacement and calculated the GC

for each author position in each year. The results are presented in Figure S5 and Table S3. These results did not differ from the primary results.

- *Controlling for Variance Across Specialties*

Because there was an increase in GC within the high-impact cross-specialty journals over the study period, two additional sensitivity analyses were completed. The first sensitivity analysis repeated the primary analysis after excluding articles published in the 4 cross-specialty journals. There was a significant positive correlation between year and GC for overall authorship ( $\rho = 0.92, p < 0.001$ ) and the last author position ( $\rho = 0.69, p = 0.02$ ), but not for the first author position ( $\rho = 0.48, p = 0.12$ ; Figure S6).

The second sensitivity analysis sought to control for the smaller number of articles published in the cross-specialty journals as compared to the other specialties, sampling 1000 articles per specialty per year. In this reduced collection, the cross-specialty journals continued to have higher GCs for the first and last author position over time, as compared to the other specialties (Figure S7 and Figure S8).
